# Supplementary material for: Identification of SARS-CoV-2-specific immune alterations in acutely ill patients
Source: bioRxiv or medRxiv preprint supplement (doi:10.1101/2020.12.21.20248642), 2020-12-22
Supplement: Supplementary file [file media-1.pdf]

**Supplemental material**

Supplemental Table 1: Clinical data related to the day of sampling (baseline sample)

| <b>Sampling</b>                                                                             | <b>SARS-CoV-2<sup>neg</sup><br/>(n = 22)</b>                                | <b>SARS-CoV-2<sup>+</sup><br/>(n = 50)</b>                                   | <b>Statistical<br/>analysis</b> |
|---------------------------------------------------------------------------------------------|-----------------------------------------------------------------------------|------------------------------------------------------------------------------|---------------------------------|
| Time from onset of COVID-19 symptoms to baseline sampling, median day (range)               | NA                                                                          | 12.0 (3-23)                                                                  | NA                              |
| Time from first documented positive SARS-CoV-2 PCR to baseline sampling, median day (range) | NA                                                                          | 6.5 (2-23)                                                                   | NA                              |
| Time from hospital admission to baseline sampling, median day (range)                       | 3.5 (1-22)                                                                  | 4.5 (1-61)                                                                   | # p = 0.4209                    |
| O <sub>2</sub> requirements at time of baseline sampling, n (%)                             | 13/22 none (59.1)<br>4/22 low flow (18.2)<br>5/22 high flow/invasive (22.7) | 21/50 none (42.0)<br>8/50 low flow (16.0)<br>21/50 high flow/invasive (42.0) | ‡ p = 0.3418                    |
| In ICU at time of baseline sampling n (%)                                                   | 10/22 (45.5)                                                                | 23/50 (46.0)                                                                 | + p > 0.9999                    |

n: number of patients in specified category; NA: not applicable

+ Fisher's exact test; # Mann-Whitney U test; ‡ Chi-squared test

Supplemental Table 2: Granulocyte &amp; monocyte-oriented panel (S1)

| Fluorochrome | Antigen | Manufacturer/Catalogue # | Clone   |
|--------------|---------|--------------------------|---------|
| FITC         | CD66b   | BD-555724                | G10F5   |
| PE           | CD33    | BioLegend-303404         | WN53    |
| APC          | ICAM-1  | BD-559771                | HA58    |
| v450         | CD15    | BD-561584                | HI98    |
| AF700        | HLA-DR  | BD-560743                | G46-6   |
| PE-CF594     | CD16    | BD-562320                | 3G8     |
| PerCP-Cy5.5  | CCR2    | BD-357203                | K036C2  |
| Pe-Cy7       | CD11b   | eBioscience-25-0118-42   | ICRF44  |
| BV605        | CD56    | BioLegend-318334         | HCD56   |
| BV785        | CD62L   | Biolegend-304830         | DREG-56 |
| BV711        | CD8     | BD-563677                | RPA-T8  |
| BUV395       | CD3     | BD-563546                | UCHT1   |
| BUV496       | CD4     | BD-612936                | SK3     |
| BUV737       | CD14    | BD-564444                | M5E2    |

Supplemental Table 3: NK Cell/Dendritic Cell-oriented Panel (S2)

| Fluorochrome | Antigen     | Manufacturer/Catalogue # | Clone    |
|--------------|-------------|--------------------------|----------|
| FITC         | CD1a        | BD-555806                | HI149    |
| PE           | TCR iNKT    | BioLegend-342904         | 6B11     |
| APC          | MCAM        | Miltenyi -130-120-701    | 541-10B2 |
| BV421        | CD123       | BD-562517                | 9F5      |
| APC-R700     | CD11c       | BD-566610                | 3.9      |
| PE-CF594     | TCR gam-del | BD-562511                | B1       |
| PerCP-Cy5.5  | CD45RO      | BD-560607                | UCHL1    |
| Pe-Cy7       | CD56        | BD-557747                | B159     |
| BV605        | CD19        | BioLegend-302244         | HIB19    |
| BV786        | CD16        | BD-563690                | 3G8      |
| BV711        | CD8         | BD-563677                | RPA-T8   |
| BUV395       | CD3         | BD-563546                | UCHT1    |
| BUV496       | CD4         | BD-612936                | SK3      |
| BUV737       | CD14        | BD-564444                | M5E2     |

Supplemental Table 4: Lymphocyte-oriented Panel (S3)

| Fluorochrome | Antigen | Manufacturer/Catalogue # | Clone    |
|--------------|---------|--------------------------|----------|
| FITC         | CD38    | BD-560982                | HIT2     |
| PE           | CD5     | BD-555353                | UCHT2    |
| APC          | CD27    | BD-558664                | M-T271   |
| v450         | CD19    | BD-560353                | HIB19    |
| AF700        | CD138   | Biolegend-356512         | MI15     |
| PerCP-Cy5.5  | CD24    | BD-561647                | ML5      |
| Pe-Cy7       | IgD     | BD-561314                | IA6-2    |
| BV605        | PD-1    | Biolegend-329924         | EH12.2H7 |
| BV786        | ALCAM   | BD-564939                | 3A6      |
| BV711        | CD8     | BD-563677                | RPA-T8   |
| BUV395       | CD3     | BD-563546                | UCHT1    |
| BUV496       | CD4     | BD-612936                | SK3      |
| BUV737       | CD14    | BD-564444                | M5E2     |

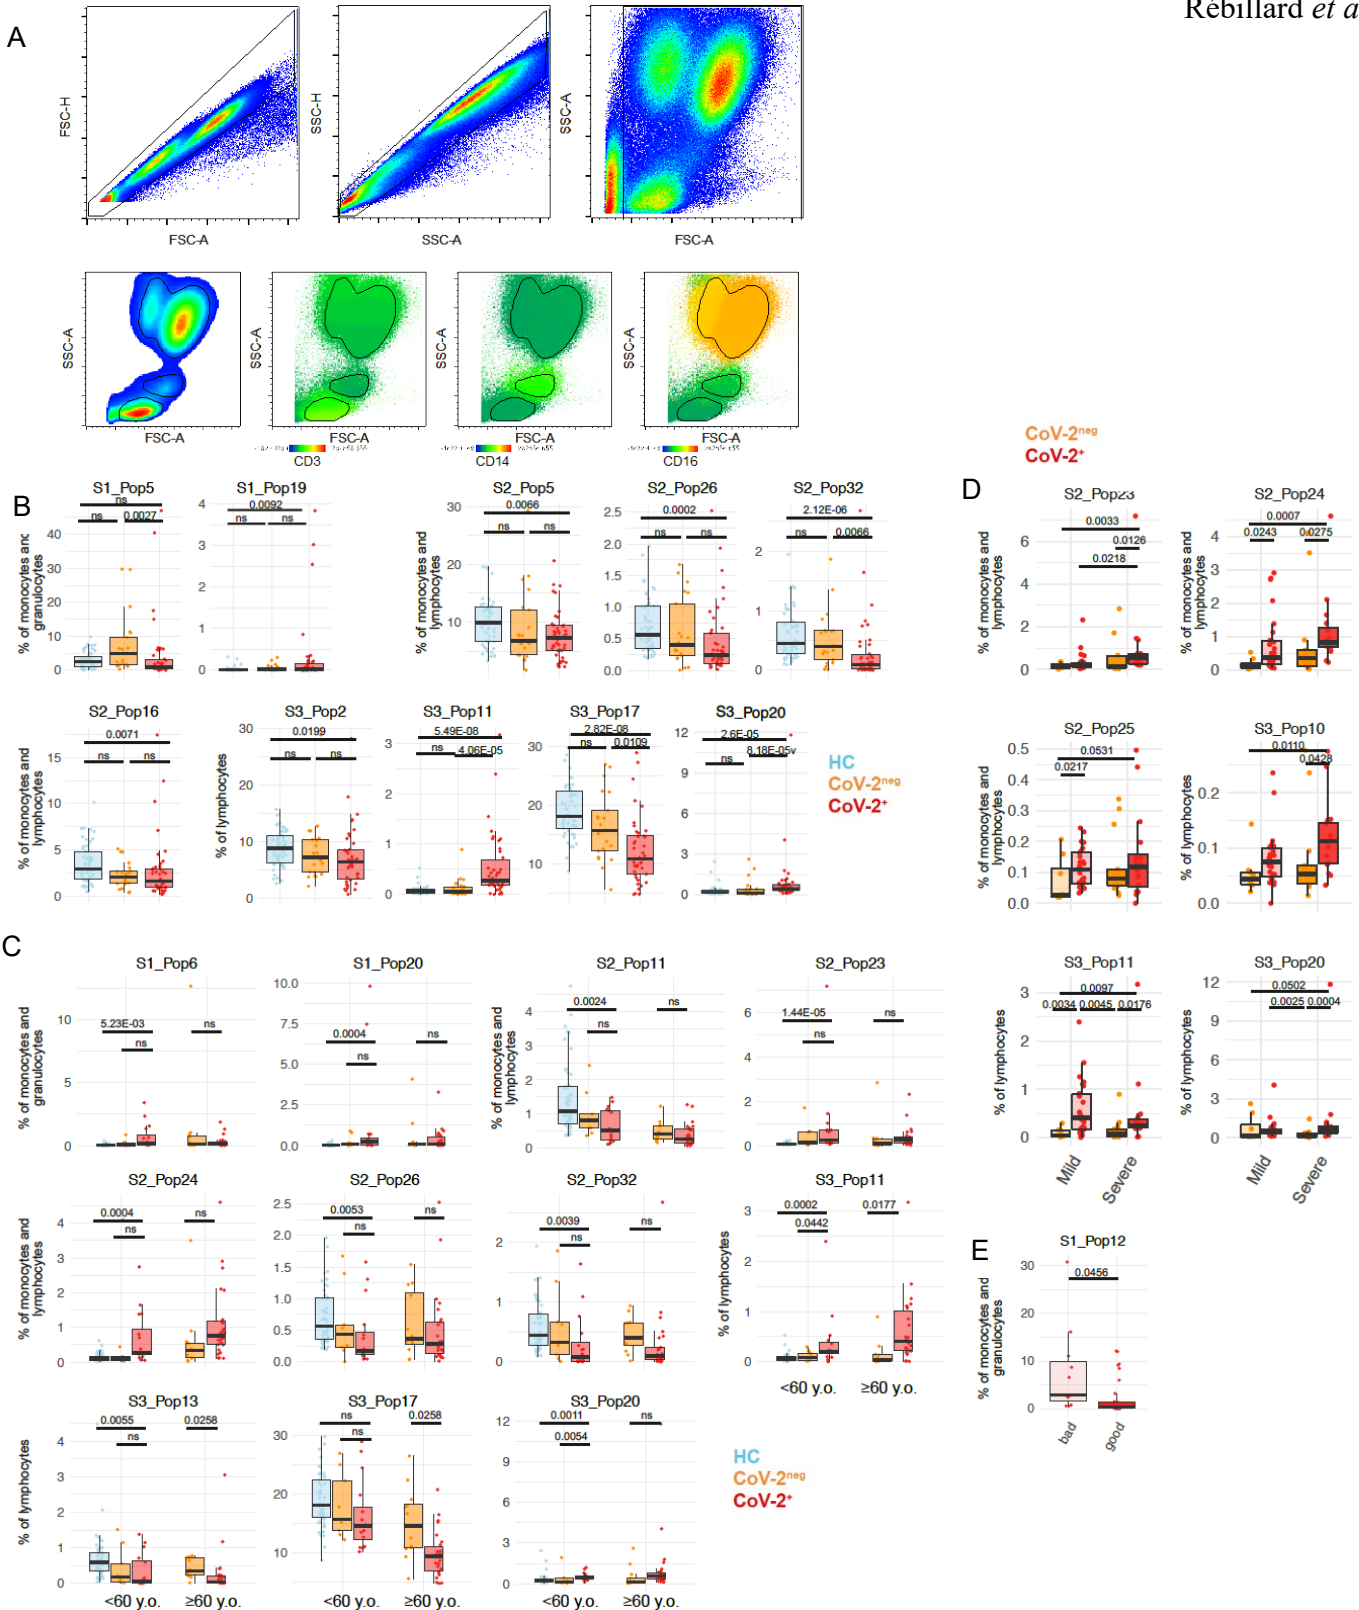

**Supplemental Figure 1. Populations altered in SARS-CoV-2<sup>+</sup> patients identified by data-driven (unbiased) analysis. (A)** Flow cytometry gating strategy for the selection of events that belong to lymphocyte, monocyte/myeloid and granulocyte before the data-driven analysis. **(B-E)** Box and Whisker plots showing frequencies of selected immune cell populations specifically dysregulated in SARS-CoV-2<sup>+</sup> patients (CoV-2<sup>+</sup>); **(B)** CoV-2<sup>+</sup> (red) compared to SARS-CoV-2<sup>neg</sup> (CoV-2<sup>neg</sup>, yellow) and healthy controls (HC, blue) (HC  $n = 49$ ; CoV-2<sup>neg</sup>  $n = 21$ ; CoV-2<sup>+</sup>  $n = 42$ ), **(C)** according to age groups (HC  $< 60$  y.o.  $n = 49$ ; CoV-2<sup>neg</sup> hospitalized  $< 60$  y.o.  $n = 9$ ,  $\geq 60$  y.o.  $n = 13$ ; CoV-2<sup>+</sup>:  $< 60$  y.o.  $n = 20$ ;  $\geq 60$  y.o.  $n = 30$ ), **(D)** according to disease severity (CoV-2<sup>neg</sup> mild/moderate disease  $n = 8$ , severe disease  $n = 14$ ; CoV-2<sup>+</sup> mild/moderate disease  $n = 29$ , severe disease  $n = 21$ ), and **(E)** according to the clinical outcome at 30 days in SARS-CoV-2<sup>+</sup> patients (NIH score 5-8,  $n = 36$ ) vs. (NIH score 1-4,  $n = 14$ ). Mann-Whitney  $U$  test (for  $n = 2$  categories) and Kruskal-Wallis test (for  $n > 2$  categories) followed by a Dunn's post hoc-test were used. ns: not significant.

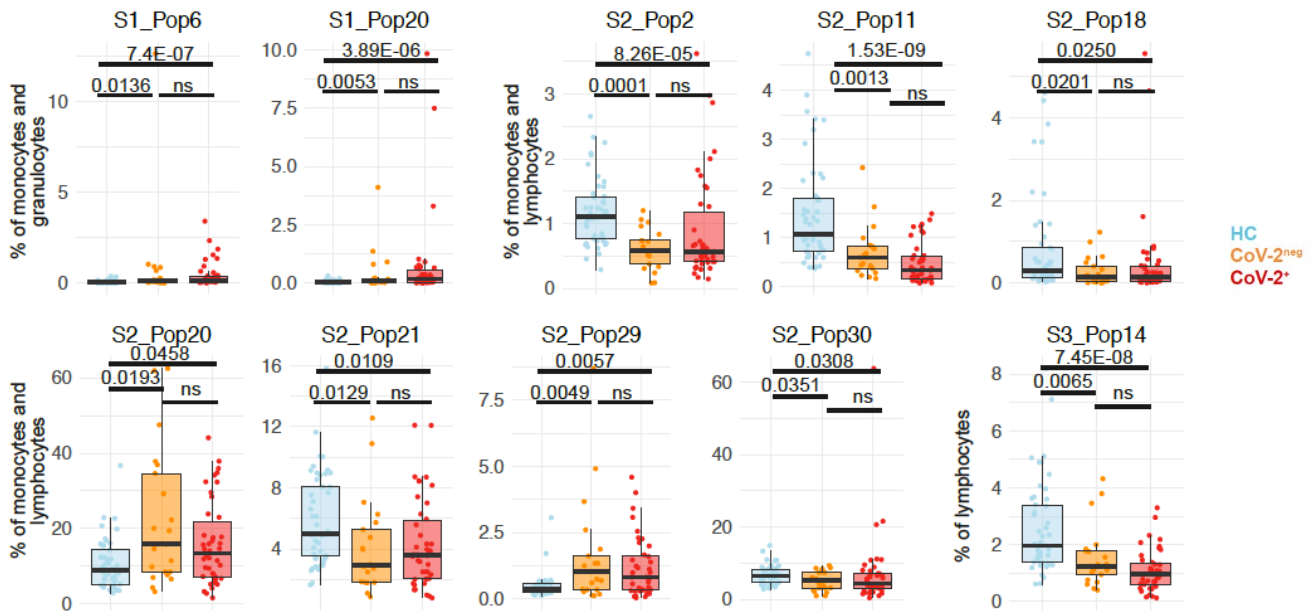

**Supplemental Figure 2. Populations altered in hospitalized patients identified by data-driven (unbiased) analysis.** Box and Whisker plots showing frequencies of selected immune cell populations dysregulated in hospitalized patients compared to healthy controls (HC); SARS-CoV-2<sup>+</sup> (CoV-2<sup>+</sup>, red) compared to SARS-CoV-2<sup>neg</sup> (CoV-2<sup>neg</sup>, yellow) and HC (blue) (HC  $n = 49$ ; CoV-2<sup>neg</sup>  $n = 21$ ; CoV-2<sup>+</sup>  $n = 42$ ). Mann-Whitney  $U$  test (for  $n = 2$  categories) and Kruskal-Wallis test (for  $n > 2$  categories) followed by a Dunn's post hoc-test were used. ns: not significant.

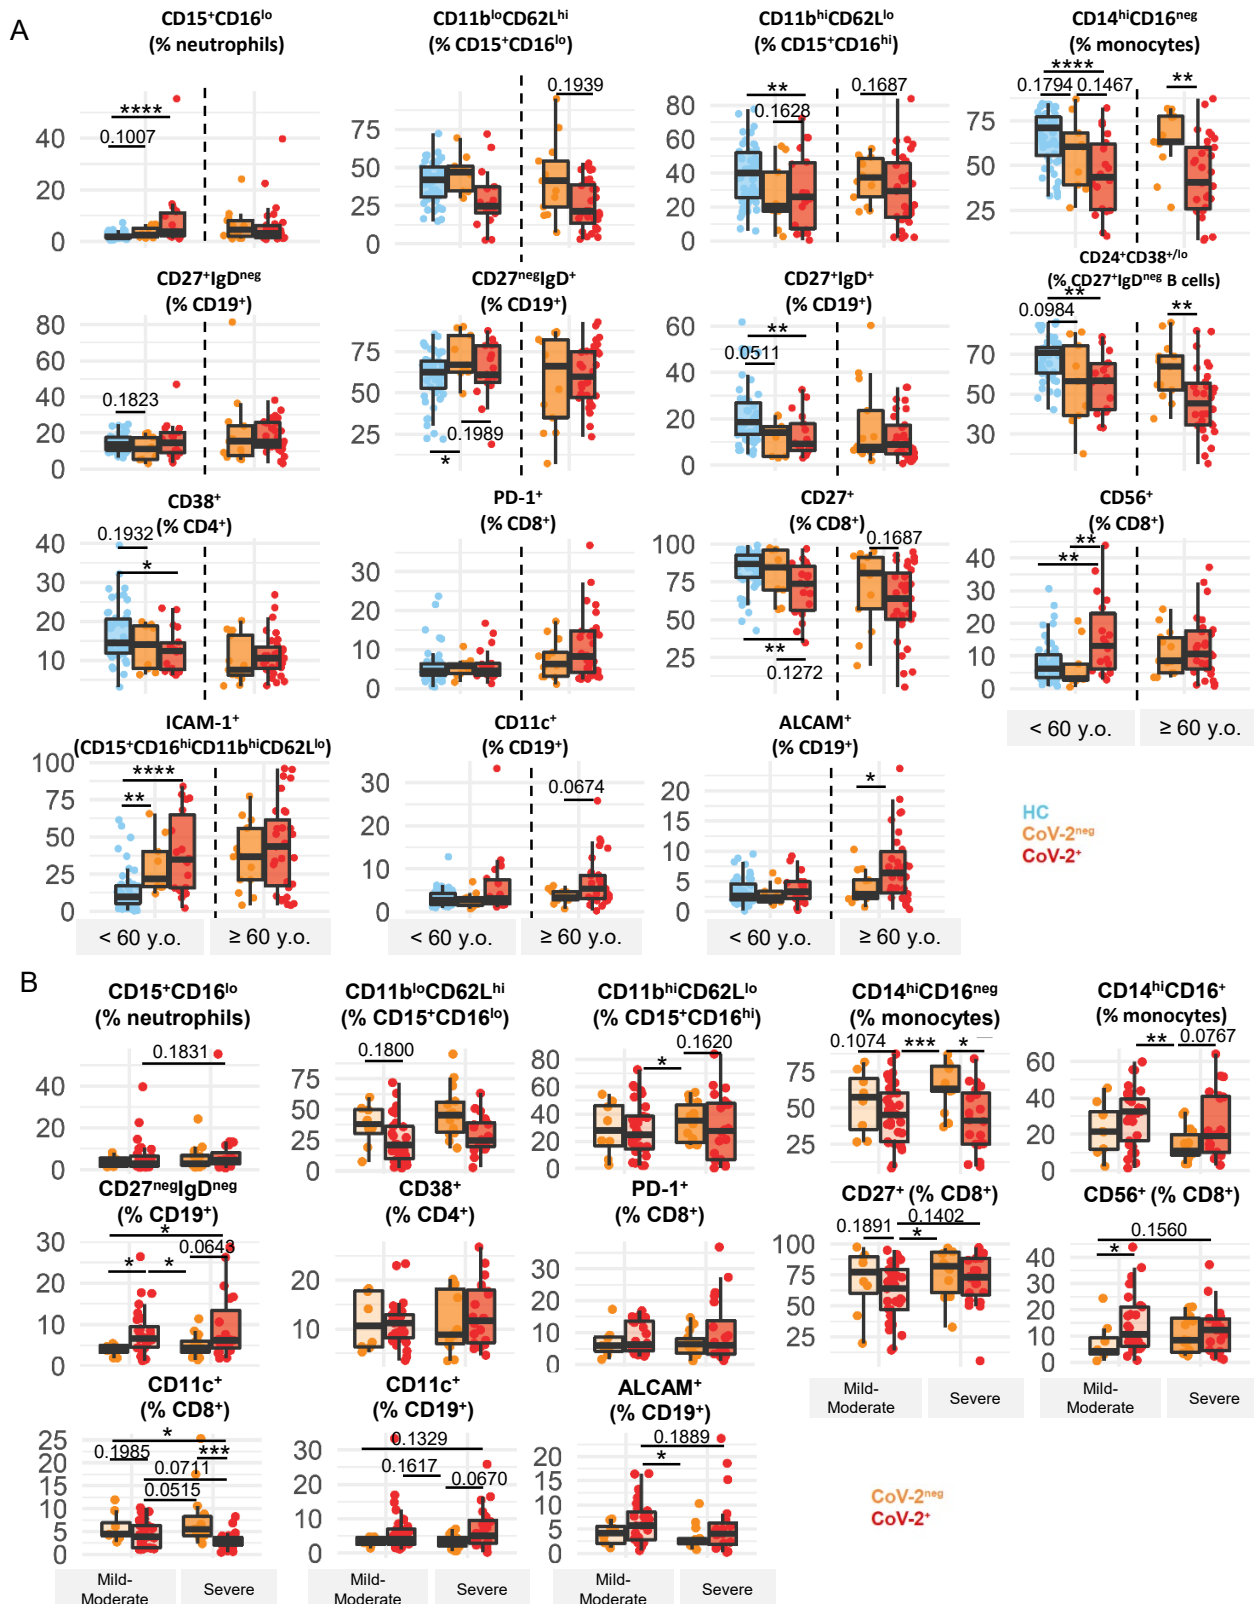

**Supplemental Figure 3. Frequencies of selected immune cell populations identified by conventional analysis. (A-B)** Box and Whisker plots showing frequencies of different subsets of immune cell populations in peripheral blood (conventional analysis) from SARS-CoV-2<sup>+</sup> (CoV-2<sup>+</sup>, red) and SARS-CoV-2<sup>neg</sup> (CoV-2<sup>neg</sup>, yellow) hospitalized patients and healthy controls (HC, blue) (A) according to age groups (HC < 60 y.o.  $n = 49$ ; CoV-2<sup>neg</sup> hospitalized < 60 y.o.  $n = 9$ ,  $\geq 60$  y.o.  $n = 13$ ; CoV-2<sup>+</sup>: < 60 y.o.  $n = 20$ ,  $\geq 60$  y.o.  $n = 30$ ), and (B) according to disease severity in hospitalized patients (CoV-2<sup>neg</sup> mild/moderate disease  $n = 8$ , severe disease  $n = 14$ ; CoV-2<sup>+</sup> mild/moderate disease  $n = 29$ , severe disease  $n = 21$ ). Mann-Whitney  $U$  test (for  $n = 2$  categories) and Kruskal-Wallis test (for  $n > 2$  categories) followed by Dunn's post-hoc test. Each dot represents one donor. \* $P < 0.05$ ; \*\* $P < 0.01$ ; \*\*\* $P < 0.001$ ; \*\*\*\* $P < 0.0001$ .

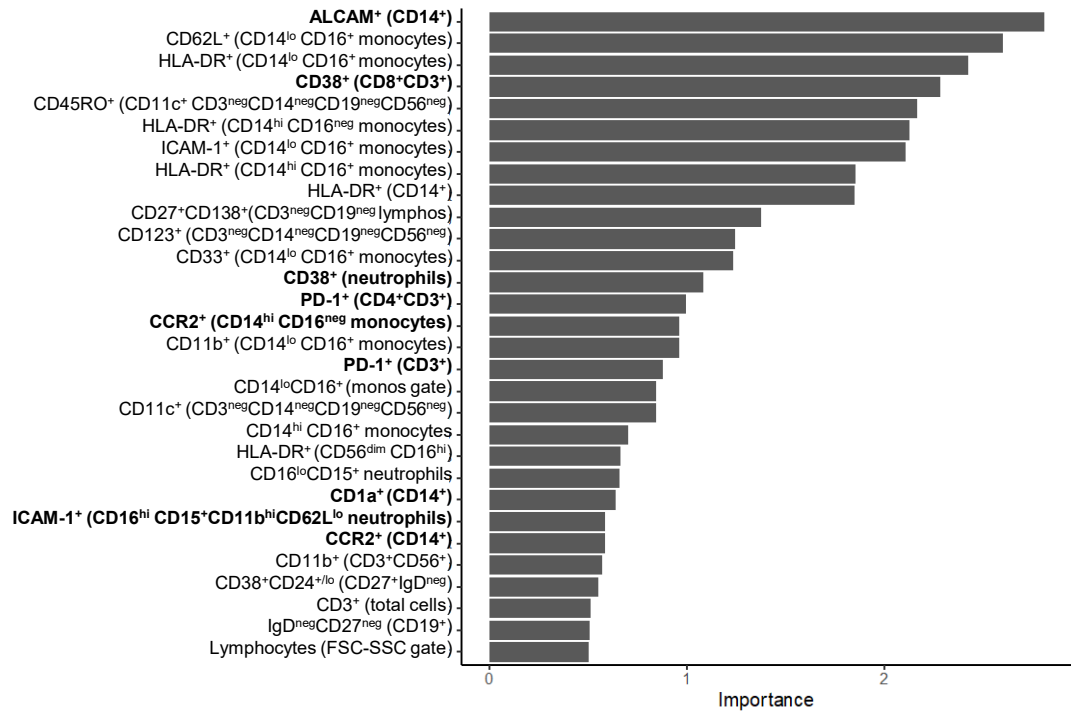

**Supplemental Figure 4. Multivariate model using random forest class prediction analysis.** Results of the top 30 cells population with the greater Gini importance index.
